# Supplementary material for: HIV-1 IN/Pol recruits LEDGF/p75 into viral particles
Source: PubMed Central journal article supplement (PMC4357141; doi:10.1186/s12977-014-0134-4), 2015-02-12
Supplement: 12977_2014_134_MOESM3_ESM.pdf [file 12977_2014_134_MOESM3_ESM.pdf]

## Supporting Tables

1  
2 **Table S1. LEDGF/p75 (peptides) detected in purified HIV virions using Mass**  
3 **Spectrometry.**

| Gene name | Protein name                      | Sequence      | In # samples found (4) |
|-----------|-----------------------------------|---------------|------------------------|
| PSIP1     | PC4 and SFRS1-interacting protein | DFKPGDLIFAK   | 4                      |
|           |                                   | QSNASSDVEVEEK | 1                      |
|           |                                   | IDNLDVNR      | 2                      |
|           |                                   | HTEMITTLK     | 2                      |
|           |                                   | VSQVIMEK      | 4                      |

4 HIV virions were obtained from the supernatant of 293T cells, purified through an iodixanol  
5 velocity gradient and treated with subtilisin. Lysed samples were run in SDS-page; part of the gel  
6 corresponding to proteins of 75 kDa was cut out, and proteins extracted subjected to mass  
7 spectrometry analysis. HIV samples were matched to HeLa samples which were processed in  
8 parallel.

9 **Table S2. Determination of the molecular mass of LEDGF/p75 fragments generated by**  
10 **HIV-1 PR *in vitro***

| STANDARD CURVE      |                 |                     | Flag-LEDGF/p75 fragments |                     |
|---------------------|-----------------|---------------------|--------------------------|---------------------|
| R <sub>f</sub> (mm) | Marker MW (kDa) | Calculated MW (kDa) | R <sub>f</sub> (mm)      | Calculated MW (kDa) |
| 0.164               | 140             | 137                 |                          |                     |
| 0.213               | 115             | 115                 | 0.311                    | 75.3*               |
| 0.300               | 80              | 84                  | 0.365                    | 64.8                |
| 0.343               | 70              | 73                  | 0.475                    | 43.8                |
| 0.430               | 50              | 53                  | 0.545                    | 34.3                |
| 0.496               | 40              | 42                  | 0.615                    | 26.8                |
| 0.586               | 30              | 30                  | 0.709                    | 19.2                |
| 0.652               | 25              | 24                  | 0.791                    | 14.4                |
| 0.766               | 15              | 16                  | 0.820                    | 12.9                |
| 0.920               | 10              | 10                  | 0.857                    | 11.4                |
| Reference protein   | HIV-1 PR        |                     | 0.877                    | 10.6                |
|                     | BSA             |                     | 0.358                    | 66.5                |

11 Calculations based on relative mobility (R<sub>f</sub>) as shown in Figures 2 and S3c and S. HIV-1 PR and  
12 BSA were used as reference proteins. \*Calculated molecular mass of full length LEDGF/p75  
13

14 **Table S3. N-terminal sequencing of LEDGF/p75-derived fragments following HIV-1 PR**  
 15 **digestion**

| Cycle no. | Prime-side (P') residues <sup>a</sup> | HIV-1 PR cleavage products of LEDGF/p75 |          |          |                                                |
|-----------|---------------------------------------|-----------------------------------------|----------|----------|------------------------------------------------|
|           |                                       | 43.8 kDa                                | 34.3 kDa | 26.8 kDa | 10.6-12.9 kDa (overlapping bands) <sup>b</sup> |
| 1         | P <sub>1</sub> '                      | V,E,T                                   | E,T,V    | E,T      | D,A,M,P                                        |
| 2         | P <sub>2</sub> '                      | E                                       | E,T      | E        | S,T,E,Q                                        |
| 3         | P <sub>3</sub> '                      | E                                       | A,E      | A,E      | V,I,R,L                                        |
| 4         | P <sub>4</sub> '                      | T                                       | G,T      | G,A      | T,E,A,V                                        |
| 5         | P <sub>5</sub> '                      | T,E                                     | V,T,E    | V        | L,G,V                                          |
| 6         | P <sub>6</sub> '                      | S,T                                     | V,T      | V        | Q,T,E                                          |
| 7         | P <sub>7</sub> '                      | S                                       | T        | T        |                                                |
| 8         | P <sub>8</sub> '                      | V                                       | T        | T        |                                                |
| 9         | P <sub>9</sub> '                      |                                         | A,E      |          |                                                |
| 10        | P <sub>10</sub> '                     |                                         | T,A      |          |                                                |
| 11        | P <sub>11</sub> '                     |                                         | A,T      |          |                                                |
| 12        | P <sub>12</sub> '                     |                                         | S        |          |                                                |

16 LEDGF/p75 was treated with HIV-1 PR for 2 h at 37°C as described in the Extended  
 17 Experimental Procedures section. <sup>a</sup> Residues C-terminal to the scissile peptide bond of the  
 18 cleavage sites are designated as prime-side (P') [1]. Fragment 43.8, 34.3, 26.8, and  
 19 overlapping bands (10.6, 11.4 and 12.9 kDa) were sequenced by N-terminal protein sequencing  
 20 and the prime-side (P') amino acids identified after each cycle of Edman degradation are listed. <sup>b</sup>  
 21 Four possible sequences were identified representing the N-terminal amino acids of LEDGF/p75  
 22 (bold) and HIV-1 PR (red), as well as two PR derived LEDGF/p75 cleavage products.  
 23

24 **Table S4. Identified cleavage site sequences and cleavage prediction algorithm of**  
 25 **octapeptides derived from LEDGF/p75 cleavage by HIV-1 PR.**

26

| Enzyme                        | Cleavage site in LEDGF/p75 <sup>a, b</sup>                        | Predicted algorithm $\Delta^f$ |
|-------------------------------|-------------------------------------------------------------------|--------------------------------|
| HIV- PR                       | SDVE $\overset{\downarrow}{\underline{V}^{110}}$ EEK <sup>d</sup> | 0.81                           |
|                               | DVEV $\overset{\downarrow}{\underline{E}^{111}}$ EKE              | 0.85                           |
|                               | KQVE $\overset{\downarrow}{\underline{T}^{159}}$ EAA              | 1.20                           |
|                               | QVET $\overset{\downarrow}{\underline{E}^{160}}$ EAG              | 1.01                           |
|                               | QRIH $\overset{\downarrow}{\underline{A}^{357}}$ EIK              | 0.80                           |
|                               | VGEG $\overset{\downarrow}{\underline{D}^{433}}$ SVI              | 0.70                           |
| Caspase-3 and -7 <sup>e</sup> | DEVPD $\overset{\downarrow}{\underline{D}^{30}}$ G                | -                              |
|                               | WEID $\overset{\downarrow}{\underline{D}^{85}}$ N                 | -                              |
|                               | DAQD $\overset{\downarrow}{\underline{D}^{486}}$ G                | -                              |

28

29 <sup>a</sup> Arrow indicates the scissile peptide bond of sequenced cleavage sites of the indicated enzyme. <sup>b</sup>  
 30 The predicted cleavage site oligopeptide sequences confirmed by N-terminal sequencing. <sup>c</sup>  
 31 Determined using the HIVcleave prediction program[1, 2]. <sup>d</sup> The underlined residues with the  
 32 superscript numbers represent the C-terminal (prime-side; P') to the scissile peptide bond of the  
 33 cleavage sites of HIV-1 PR, and caspase-3 and -7, respectively. <sup>e</sup> Caspase-3 and -7 cleavage site  
 34 sequences in LEDGF/p75 described in [2].

35

36 **Supporting References**

- 37 1 Schechter I, Berger A: **On the size of the active site in proteases. I. Papain.** *Biochemical and*  
38 *Biophysical Research Communications* 1967, **27**:157-162.
- 39 2 Wu X, Daniels T, Molinaro C, Lilly MB, Casiano CA: **Caspase cleavage of the nuclear**  
40 **autoantigen LEDGF/p75 abrogates its pro-survival function: implications for autoimmunity**  
41 **in atopic disorders.** *Cell Death Differ* 2002, **9**:915-925.

42

43
