# Supplementary material for: HIV-1 IN/Pol recruits LEDGF/p75 into viral particles
Source: PubMed Central journal article supplement (PMC4357141; doi:10.1186/s12977-014-0134-4), 2015-02-12
Supplement: 12977_2014_134_MOESM7_ESM.pdf [file 12977_2014_134_MOESM7_ESM.pdf]

**A**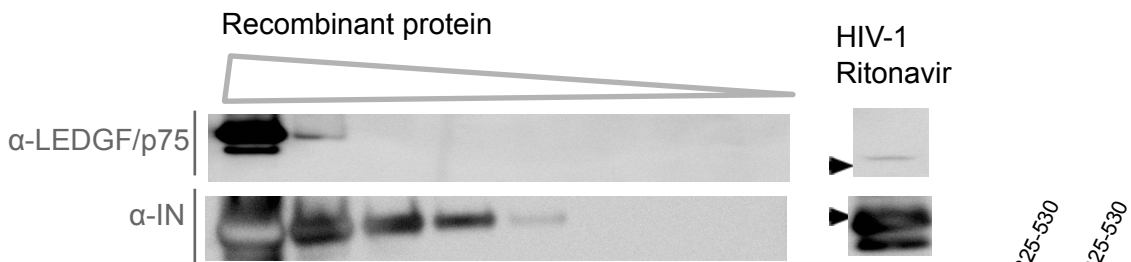**B**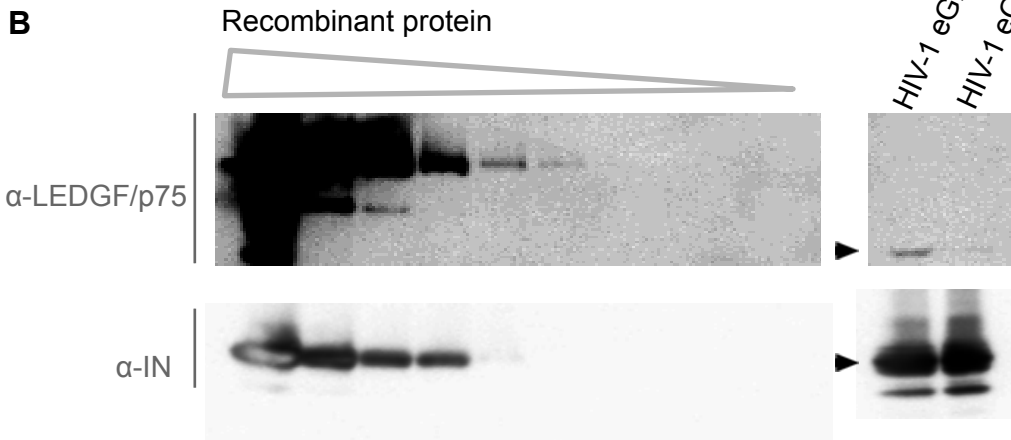**Figure S6**
